# Supplementary material for: Effectiveness of platelet-rich plasma in the treatment of anterior cruciate ligament injuries: A Systematic Review and Meta-analysis
Source: Research Square preprint supplement (doi:10.21203/rs.3.rs-1074595/v1), 2021-11-17
Supplement: Supplementary file 1 [file 2baa3db918532864a74b2273.docx]

Basic characteristics of included studies

| **Studies** | **Country** |  | **Sample size** | **Age(years)**  **Mean±SD or range** | **Female** | **Injured side(left/right)** | **Is meniscus injured?** | **Dropout** | **Outcome measurement** | **Follow-up** | **Graft** | **移植物** |
| --- | --- | --- | --- | --- | --- | --- | --- | --- | --- | --- | --- | --- |
| LiWeifeng et al.  2018.06 [34] | China | ACLR+PRP  ACLR+NONE | 21  20 | 34.76±9.782  31.40±9.450 | 6  7 | 9/12  7/13 | 13  10 | None | IKDC VAS Lysholm  Bone tunnel size at 18 months postoperatively KT-2000 at 18 months postoperatively  MRI performence at 18 months postoperatively | 3,6,18months | Smitendinosus+Gracilis | None |
| Chenrongjin et al.  2020.04[29] | China | ACLR+PRP  ACLR+Normal Saline | 20  20 | 35.11±14.23  36.86±12.02 | 8  6 | 9/12  7/13 | None | None | IKDC SNQ1 Lysholm | 3,6,12months | Semitendinosus+Gracilis |  |
| JiQingming et al.  2017.04[30] | China | ACLR+PRP  ACLR+Normal Saline | 21  21 | 31.59[17-44] 33.68[18-44] | 9  12 | 10/7 7/12 | None | 4  2 | IKDC VAS Lysholm  Graft signals at 12 months postoperatively  The second arthroscopic examination at 12 months postoperatively | 3,12months | Semitendinosus+Gracilis |  |
| ZangYefeng et al.  2019.09[29] | China | ACLR+PRP  ACLR+NONE | 56  56 | 40.16±5.82  39.25±5.37 | 20  18 | 22/34  25/31 | Not mention | None | KT-1000 Lysholm  IKDC and its excellent or good rate  Degradation of tibial tunnel | 6,12months | Semitendinosus+Gracilis |  |
| F.Mirzatolooei et al.  2013.03[29] | Iran | ACLR+PRP  ACLR+NONE | 25  25 | 26.4[18-40]  26.9[18-40] | 3  1 | Not mention | 5  3 | 2  2 | KT-1000  Apertures and mid-sections of the femoral and tibial tunnels | 3months | Hamstring quadrupled graft |  |
| M.Komzák et al.  2015[29] | Czech Republic | ACLR+PRP  ACLR+NONE | 20  20 | Only the population baseline for the total number of patients is described：Age=31.3years[17-51],Male/Female=22/18，Left/Right=21/19 | | | Not mention | None | IKDC  The subsidence of swelling in the tunnel-surrounding tissues | 3,12months | Hamstring |  |
| **1****SNQ：**The signal/noise quotient (SNQ) calculated according to the signal intensity of the graft is a good index to evaluate the graft maturity. | | | | | | | | | | | |  |
|  | | | | | | | | | | | |  |
