# Supplementary material for: Effectiveness of platelet-rich plasma in the treatment of anterior cruciate ligament injuries: A Systematic Review and Meta-analysis
Source: Research Square preprint supplement (doi:10.21203/rs.3.rs-1074595/v1), 2021-11-17
Supplement: Supplementary file 2 [file d9fe034268aa47b58183ee85.docx]

The prepartion and application of PRP

M.Komzák 2015[29] Prepartion: Venous blood was drawn from the peripheral venous of the patient's forearm and mixed with 1 mL of antioxidant glycerin solution and 1 mL of antioxidant. The PRP was obtained directly after centrifugation in a 1200 r/min centrifuge for 10 minutes at 20℃ room temperature.

Application: After the graft was fixed, the joint effusion was cleared and 6ml PRP was injected into the graft.

F.Mirzatolooei 2013.03[29] Prepartion: The PRP was prepared using a double syringe system (Arthrex) and 10 ml of the patient’s blood was centrifuged at 1500 rpm for five minutes, from which 3.5 ml of PRP was obtained.

Application: At the completion of surgery, in the PRP group fluid was evacuated from the knee and 2 ml of PRP were then injected into the femoral tunnel and 1.5 ml into the tibial tunnel.

Zang 2019.09[29] Prepartion: It only explains the procedure of PRP 20ml by double centrifugation method for reserve,without further explanation.

Application: Soak the graft in 5ml of PRP. The fluid in the articular cavity was released postoperative, and the prepared PRP was injected into the ligament stump, tibial tunnel and articular cavity.

Ji 2017.04[30] Prepartion: Blood was collected through the patient's antecubital vein, shaken up and centrifuged for 10 minutes at a centrifugation radius of 15cm and 2000 r/min. After centrifugation, the whole blood was divided into three layers, and the lower layer of red blood cells were removed. The remaining suspension was centrifuged again in the same way as above, and the upper layer of pale-yellow supernatant was removed, and the remaining plasma component was identified as PRP after static vibration.

Application: Patients in the PRP group were treated with 5 mL PRP infiltration into the autograft tendon for 10 minutes and routine anatomic reconstruction of ACL. After reconstruction, the incision was closed and the remaining 5ml was injected percutaneous into the joint cavity. The PRP group received the second and third injections of PRP (5 mL) on the 15th and 30th days postoperative.

Chen 2020.04[29] Prepartion: The detailed procedure is not described.

Application: In the PRP group, 1ml PRP was injected into the tibial end of the graft with a syringe, and 1ml PRP was injected into the femoral end of the graft. And, 3ml PRP was injected into the intraarticular surface of the graft under arthroscopic gaze.

Li 2018.06 [34] Prepartion: The PRP was prepared by double centrifugal. 20 ml of the patient’s blood was extracted from the median cubital vein and shaken slowly. The first centrifugal force was 275×g with 10 minutes. The second centrifugal force was 870×g with 15 minutes. Finally, there were 4ml of PRP obtained, and 0.2ml of 10% calcium chloride was added to activate platelets in the PRP.

Application: After ACLR, 4 ml PRP was injected into the knee cavity at once. Starting from one and a half months postoperative, 4ml PRP was injected into the articular cavity regularly every week for five consecutive weeks, with six times as a course of treatment and one course of treatment between them.
